# Supplementary material for: A self-powered solar-blind photodetector with largeVocenhancing performance based on the PEDOT:PSS/Ga2O3organic–inorganic hybrid heterojunction
Source: Royal Society of Chemistry journal article supplement (doi:10.1039/c9tc06011a), 2019-12-04
Supplement: c9tc06011a1.pdf [file c9tc06011a1.pdf]

## Supporting Information

### **A Self-Powered Solar-Blind Photodetector with Large $V_{oc}$ Enhancing Performance Based on PEDOT:PSS/Ga<sub>2</sub>O<sub>3</sub> Organic-Inorganic Hybrid Heterojunction**

Shan Li,<sup>a, b</sup> Zuyong Yan,<sup>a, b</sup> Zeng Liu,<sup>a, b</sup> Jun Chen,<sup>c</sup> Yusong Zhi,<sup>a, b</sup>

Daoyou Guo,<sup>\*, d</sup> Peigang Li,<sup>\*, a, b</sup> Zhenping Wu,<sup>a, b</sup> and Weihua Tang<sup>\*, a, b</sup>

<sup>a</sup> Laboratory of Information Functional Materials and Devices, School of Science, Beijing University of Posts and Telecommunications, Beijing 100876, China.

<sup>b</sup> State Key Laboratory of Information Photonics and Optical Communications, Beijing University of Posts and Telecommunications, Beijing 100876, China.

<sup>c</sup> Department of Bioengineering, University of California, Los Angeles, CA 90095, United States.

<sup>d</sup> Center for Optoelectronics Materials and Devices & Key Laboratory of Optical Field Manipulation of Zhejiang Province, Department of Physics, Zhejiang Sci-Tech University, Hangzhou 310018, China.

\*E-mail: dyguo@zstu.edu.cn.

\*E-mail: pgli@bupt.edu.cn.

\*E-mail: whtang@bupt.edu.cn.

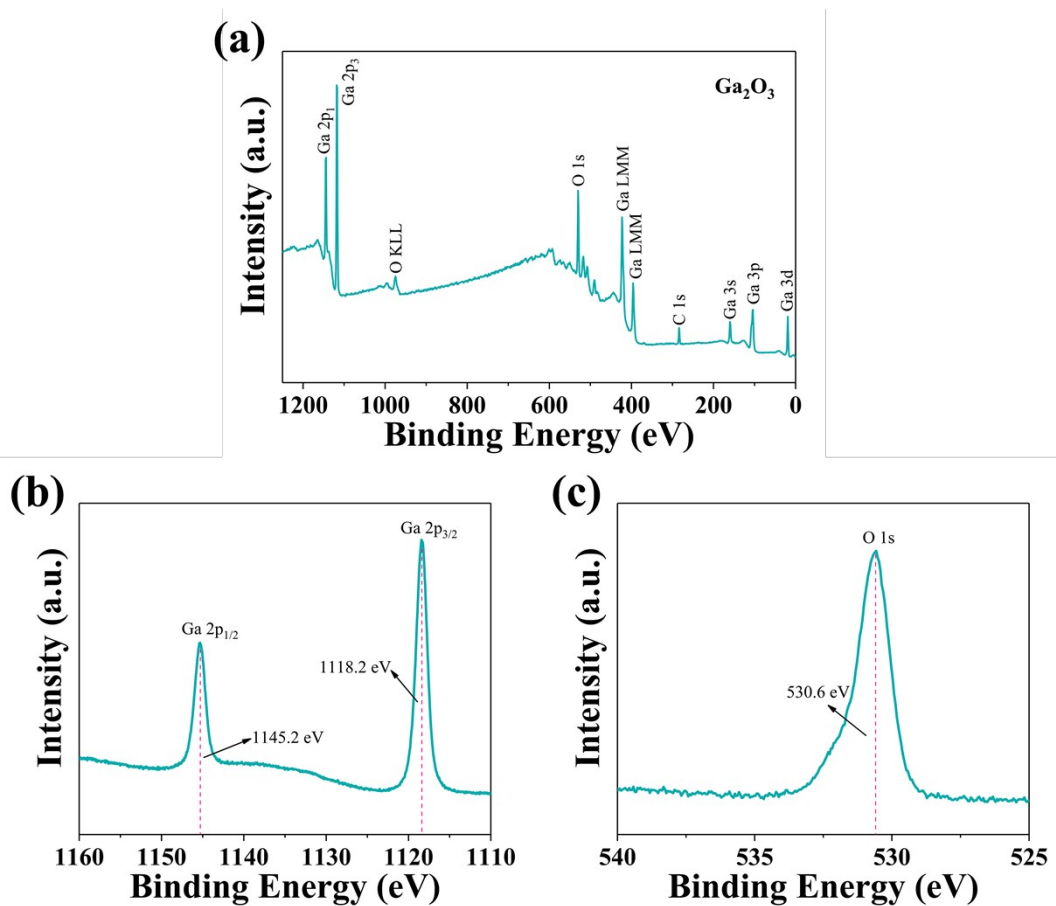

**Figure S1.** XPS spectra of the Ga<sub>2</sub>O<sub>3</sub> thin film fabricated by MOCVD: (a) full scan, and precision scan for (b) Ga2p and (c) O1s.

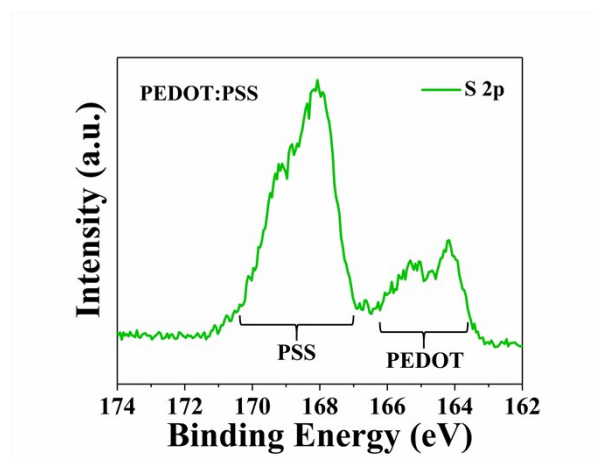

**Figure S2.** XPS spectrum with precision scan for S2p of the PEDOT:PSS thin film fabricated by spin coating method.

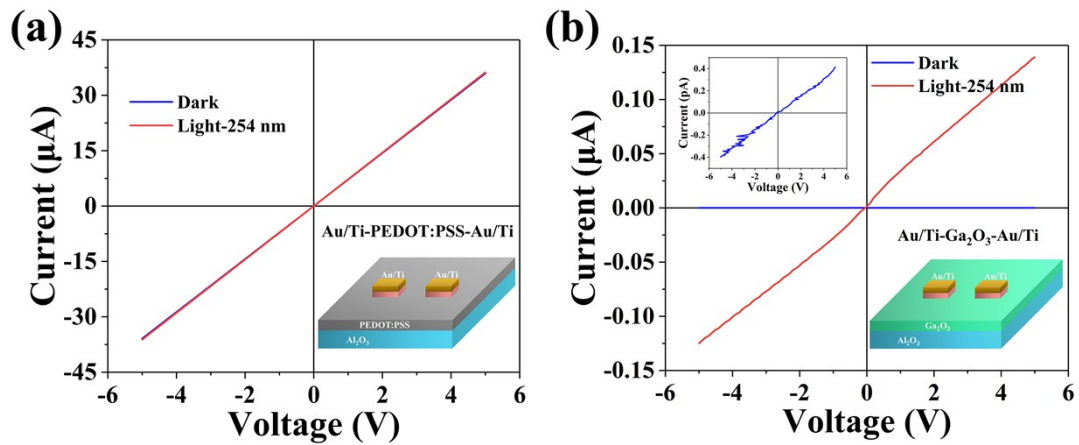

**Figure S3.** The I–V characteristics of (a) the PEDOT:PSS MSM single device and (b) the Ga<sub>2</sub>O<sub>3</sub> MSM single device under dark and light-254 nm illumination, respectively. The inset is the corresponding schematic diagram of its MSM structure. Additionally, the detail I-V curve of the Ga<sub>2</sub>O<sub>3</sub> MSM device under dark has been enlarged and presents as an inset in (b). Under same radiation condition, the photocurrent of the PEDOT:PSS MSM single device is about 300 times larger than that of the Ga<sub>2</sub>O<sub>3</sub> MSM single device which demonstrates a high conductivity.

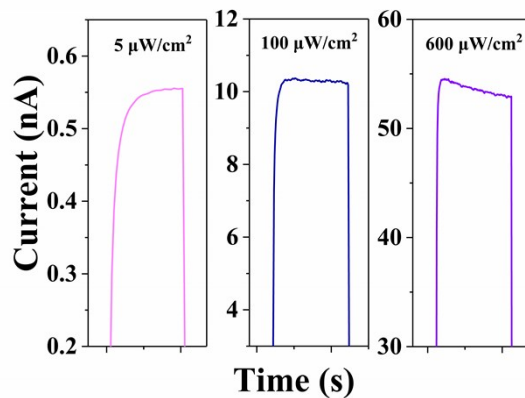

**Figure S4.** The time-dependent photoresponse curves at 0V with light intensities of (a) 5, (b) 100 and (c) 600  $\mu\text{W}/\text{cm}^2$ , respectively.

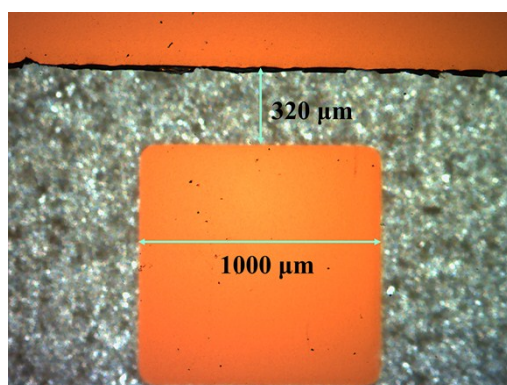

**Figure S5.** The microscope image of the effective irradiation area between two Au/Ti electrodes (one electrode on PEDOT:PSS film and the other electrode on Ga<sub>2</sub>O<sub>3</sub> film).

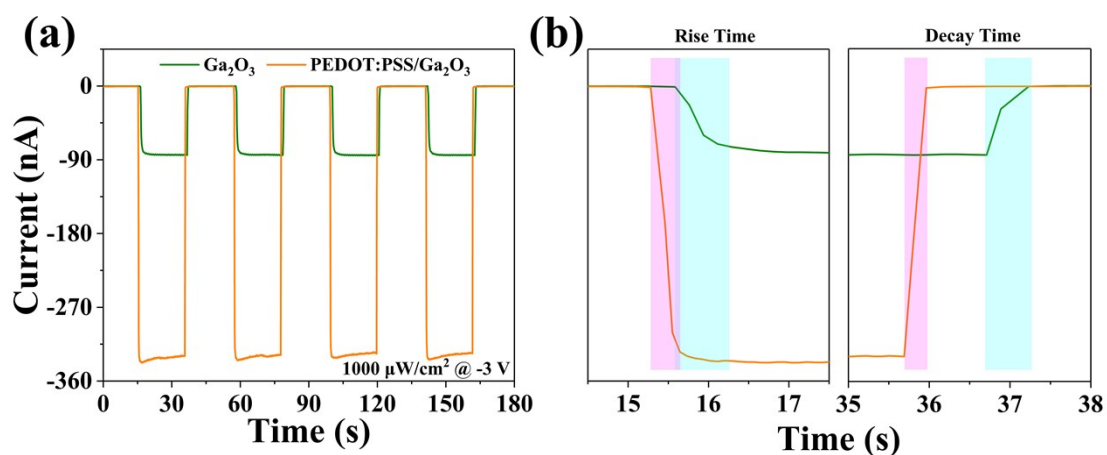

**Figure S6.** The comparison between Ga<sub>2</sub>O<sub>3</sub> single device and PEDOT:PSS/Ga<sub>2</sub>O<sub>3</sub> hybrid heterojunction device in (a) transient response current and (b) response speed. The photocurrent of the PEDOT:PSS/Ga<sub>2</sub>O<sub>3</sub> hybrid heterojunction device is 330 nA which is larger than the 84 nA of Ga<sub>2</sub>O<sub>3</sub> MSM single device at -3 V with 254 nm light intensity of 1000 μW/cm<sup>2</sup>. Both the rise and decay times of the PEDOT:PSS/Ga<sub>2</sub>O<sub>3</sub> hybrid heterojunction device (magenta area in Figure S6b) are both faster than that of Ga<sub>2</sub>O<sub>3</sub> MSM single device (cyan area in Figure S6b) under on/off switch of UV lamp.
